# Supplementary material
Source: PubMed Central journal article supplement (PMC1839021)
Supplement: bjpg56-453TableS1.pdf [file bjpg56-453TableS1.pdf]

**Supplementary Table 1. The prevalence and incidence of postcoital bleeding in the community.**

| Study                                       | Setting                                  | Country       | Age range years | Number of women                  | Prevalence or incidence                                                                     | Type of symptom                                                                                                          |
|---------------------------------------------|------------------------------------------|---------------|-----------------|----------------------------------|---------------------------------------------------------------------------------------------|--------------------------------------------------------------------------------------------------------------------------|
| Hakama <i>et al</i> , 1975 <sup>33</sup>    | Community cervical screening programme   | Finland       | All             | 406 321                          | Prevalence 0.7% of women                                                                    | 'Have you in the course of the past 2 months had irregular bleedings after sexual intercourse?'                          |
| Goldacre <i>et al</i> , 1978 <sup>28</sup>  | Community family planning clinic         | England       | 16–47           | 1498                             | Prevalence 5% of women                                                                      | 'Do you experience blood spotting after intercourse?'                                                                    |
| Lindner <i>et al</i> , 1988 <sup>29</sup>   | Planned parenthood clinic                | North America | Not given       | 493                              | Prevalence 9% of women                                                                      | 'Postcoital bleeding'                                                                                                    |
| Viikki <i>et al</i> , 1998 <sup>27</sup>    | Community cervical screening program     | Finland       | 30–60           | All women participated 1985–1990 | Prevalence 0.7% of women                                                                    | 'Have you in the course of the past 2 months had irregular bleedings after sexual intercourse?' with negative screening. |
| Anorlu <i>et al</i> , 2003 <sup>34</sup>    | Cervical screening in a hospital clinic  | Nigeria       | 16–81           | 884                              | Prevalence 6% of women                                                                      | 'Postcoital bleeding'.                                                                                                   |
| Verhoeven <i>et al</i> , 2003 <sup>35</sup> | Chlamydial screening in general practice | Belgium       | 15–40           | 787                              | Prevalence 1% of sexually active women                                                      | 'Postcoital bleeding in the past 3 months' 'frequently'                                                                  |
| Shapley <i>et al</i> , 2004 <sup>31</sup>   | Community survey                         | England       | 18–54           | 1861<br>1513                     | Prevalence 6% of menstruating women<br>Annual cumulative incidence 6% of menstruating women | 'Over the last 6 months have you bled during or after sexual intercourse (making love) when you were not on a period?'   |
| Götz <i>et al</i> , 2005 <sup>36</sup>      | Community survey                         | Holland       | 15–29           | 4304                             | Prevalence of 3% of sexually active women                                                   | 'Previous 4 weeks (post) coital bleeding'                                                                                |
