# Supplementary material
Source: PubMed Central journal article supplement (PMC1839021)
Supplement: bjpg56-453TableS2.pdf [file bjpg56-453TableS2.pdf]

**Supplementary Table 2. Studies reporting the prevalence of postcoital bleeding in women with invasive carcinoma of the cervix.**

| Study                                           | Country       | Age range years | Number of women | Histology of carcinoma                                               | Postcoital bleeding | Type of symptom                                                                                                      |
|-------------------------------------------------|---------------|-----------------|-----------------|----------------------------------------------------------------------|---------------------|----------------------------------------------------------------------------------------------------------------------|
| Truelsen, 1949 <sup>24</sup>                    | Denmark       | Not given       | 881<br>1923     | Not given<br>Not given                                               | 23%<br>5%           | 'Noticed postcoital bleeding'.<br>'Post-coital bleeding ... had observed this as first symptom.'                     |
| Dass & Mookerjea, 1961 <sup>25</sup>            | India         | Not given       | 590             | Not given<br>(1 case stage 0)                                        | 0.7%                | Presenting symptoms 'postcoital bleeding'.                                                                           |
| Subhadra Devi & Prabhavathi, 1961 <sup>26</sup> | India         | Not given       | 2046            | 98% Squamous epitheliomata<br>8% Adenocarcinoma<br>(4 cases stage 0) | 4%                  | 'Postcoital bleeding'.                                                                                               |
| Kauraniemi, 1969 <sup>43</sup>                  | Finland       | 25–60           | 17              | 94% Squamous cell<br>6% Adenocarcinoma                               | 18%                 | 'Have you in the course of the last 2 months had irregular bleeding after sexual intercourse?' at time of screening. |
| Das, 1970 <sup>44</sup>                         | India         | 21–70           | 250             | 98% Squamous cell<br>2% Adenocarcinoma                               | 6%                  | Postcoital bleeding 'at the time of admission'.                                                                      |
| Pardanani <i>et al</i> , 1975 <sup>45</sup>     | North America | 22–85           | 231             | 92% Squamous cell<br>8% Adenocarcinoma                               | 10%                 | Postcoital bleeding not further defined but each woman categorised into one symptom only.                            |
| Adelusi, 1979 <sup>46</sup>                     | Nigeria       | Not given       | 594             | 83% Squamous cell<br>13% Undifferentiated<br>5% Adenocarcinoma       | 11%                 | Clinical presentation 'postcoital bleeding'.                                                                         |
| Nnatu & Durosinmi-Etti, 1985 <sup>47</sup>      | Nigeria       | 20–76           | 254             | 82% Squamous cell<br>14% Anaplastic<br>4% Adenocarcinoma             | 39%                 | Presenting clinical feature of postcoital bleeding.                                                                  |
| Saigo <i>et al</i> , 1986 <sup>48</sup>         | North America | 10–91           | 136             | 100% Adenocarcinoma<br>(4 cases stage 0)                             | 4%                  | 'Presenting symptom' of postcoital bleeding with each woman categorised into one symptom only.                       |
| Schwartz <i>et al</i> , 1988 <sup>49</sup>      | North America | 20–54           | 40              | 83% Squamous cell<br>8% Adenosquamous<br>10% Adenocarcinoma          | 25%                 | Developed invasive cancer within 17 months of a negative smear and had postcoital bleeding at time of diagnosis.     |
| Emembolu & Ekwempu, 1988 <sup>50</sup>          | Nigeria       | 20–60           | 45              | 100% Squamous cell                                                   | 36%                 | Presentation with postcoital bleeding.                                                                               |
| Machoki & Rogo, 1990 <sup>51</sup>              | Kenya         | 20–64           | 85              | 93% Squamous cell<br>7% Adenocarcinoma                               | 34%                 | Presenting symptom of postcoital bleeding.                                                                           |
| Pretorius <i>et al</i> , 1991 <sup>30</sup>     | North America | 23–76           | 81              | 74% Squamous cell<br>26% Adenosquamous or Adenocarcinoma             | 6%                  | The presenting symptom (postcoital bleeding) that caused the woman to see the physician who made the diagnosis.      |
| Angel <i>et al</i> , 1992 <sup>52</sup>         | North America | 20–85           | 89              | 100% Adenocarcinoma                                                  | 16%                 | 'Presenting symptom' of postcoital bleeding with each woman categorised into one symptom only.                       |
| Onwudiegwu <i>et al</i> , 1999 <sup>53</sup>    | Nigeria       | 30–85           | 146             | 97% Squamous cell<br>3% Adenocarcinoma                               | 20%                 | 'Associated symptom' of postcoital bleeding.                                                                         |
| Ijaiya <i>et al</i> , 2004 <sup>54</sup>        | Nigeria       | 25–85           | 149             | 85% Squamous cell<br>9% Adenosquamous<br>5% Adenocarcinoma           | 21%                 | 'Symptoms experienced' of postcoital bleeding                                                                        |
