# Supplementary material
Source: PubMed Central journal article supplement (PMC1839021)
Supplement: bjpg56-453TableS3.pdf [file bjpg56-453TableS3.pdf]

**Supplementary Table 3. The proportion of women with postcoital bleeding investigated in secondary care who have cancer.<sup>a</sup>**

| Study                                        | Country   | Age range years | Number of women | Symptoms                                                                                                                                                       | Proportion with cancer |             |          |
|----------------------------------------------|-----------|-----------------|-----------------|----------------------------------------------------------------------------------------------------------------------------------------------------------------|------------------------|-------------|----------|
|                                              |           |                 |                 |                                                                                                                                                                | Vaginal                | Endometrial | Cervical |
| MacKenzie & Bibby, 1977 <sup>59</sup>        | England   | Not given       | 193             | Intermenstrual bleeding or postcoital bleeding/discharge as the indication for dilatation and curettage.                                                       | 0%                     | 0%          | 0%       |
| Allen <i>et al</i> , 1990 <sup>60</sup>      | Australia | Not given       | 539             | Postcoital or intermenstrual bleeding as the perceived indication for a diagnostic procedure of dilatation and curettage and/or hysterectomy.                  | 0%                     | 0.7%        | 1%       |
| Shalini <i>et al</i> , 1998 <sup>61</sup>    | India     | Not given       | 110             | Postcoital bleeding presenting to a colposcopy clinic.                                                                                                         | 0%                     | 0%          | 6%       |
| Decloedt & Fenton, 1999 <sup>62</sup>        | England   | 19–93           | 18              | Postcoital bleeding as the indication for referral to an outpatient hysteroscopy clinic following assessment in a general gynaecology clinic.                  | 0%                     | 0%          | 0%       |
| Rosenthal <i>et al</i> , 2001 <sup>13</sup>  | England   | 18–64           | 314             | Postcoital bleeding presenting to a colposcopy clinic (for 57% of the women it was the main reason).                                                           | 0.3%                   | 0.6%        | 3%       |
| Jha & Sabharwal, 2002 <sup>11</sup>          | England   | Not given       | 45              | Postcoital bleeding and a negative smear or no smear presenting to a colposcopy clinic. The one case of vaginal carcinoma was in a woman with no cervix.       | 2%                     | 0%          | 0%       |
| Morrison <i>et al</i> , 2003 <sup>4</sup>    | England   | Not given       | 51              | Suspicious lesions of the vagina or cervix or with a 4-week or longer history of postcoital bleeding referred to a suspected gynaecological malignancy clinic. | 0%                     | 0%          | 0%       |
| Selo-Ojeme <i>et al</i> , 2004 <sup>63</sup> | England   | Not given       | 248             | Referred to a general gynaecology or colposcopy clinic with a diagnosis of postcoital bleeding.                                                                | 0%                     | 0%          | 0%       |

<sup>a</sup>Some of the studies included women without postcoital bleeding in the study group.
